# Supplementary material for: Quantifying the Immediate Response of Soil to Wild Boar (Sus scrofa L.) Grubbing in Mediterranean Olive Orchards
Source: MDPI journal article supplement (doi:10.3390/soilsystems7020038), 2023-04-17
Supplement: s1 [file s1]

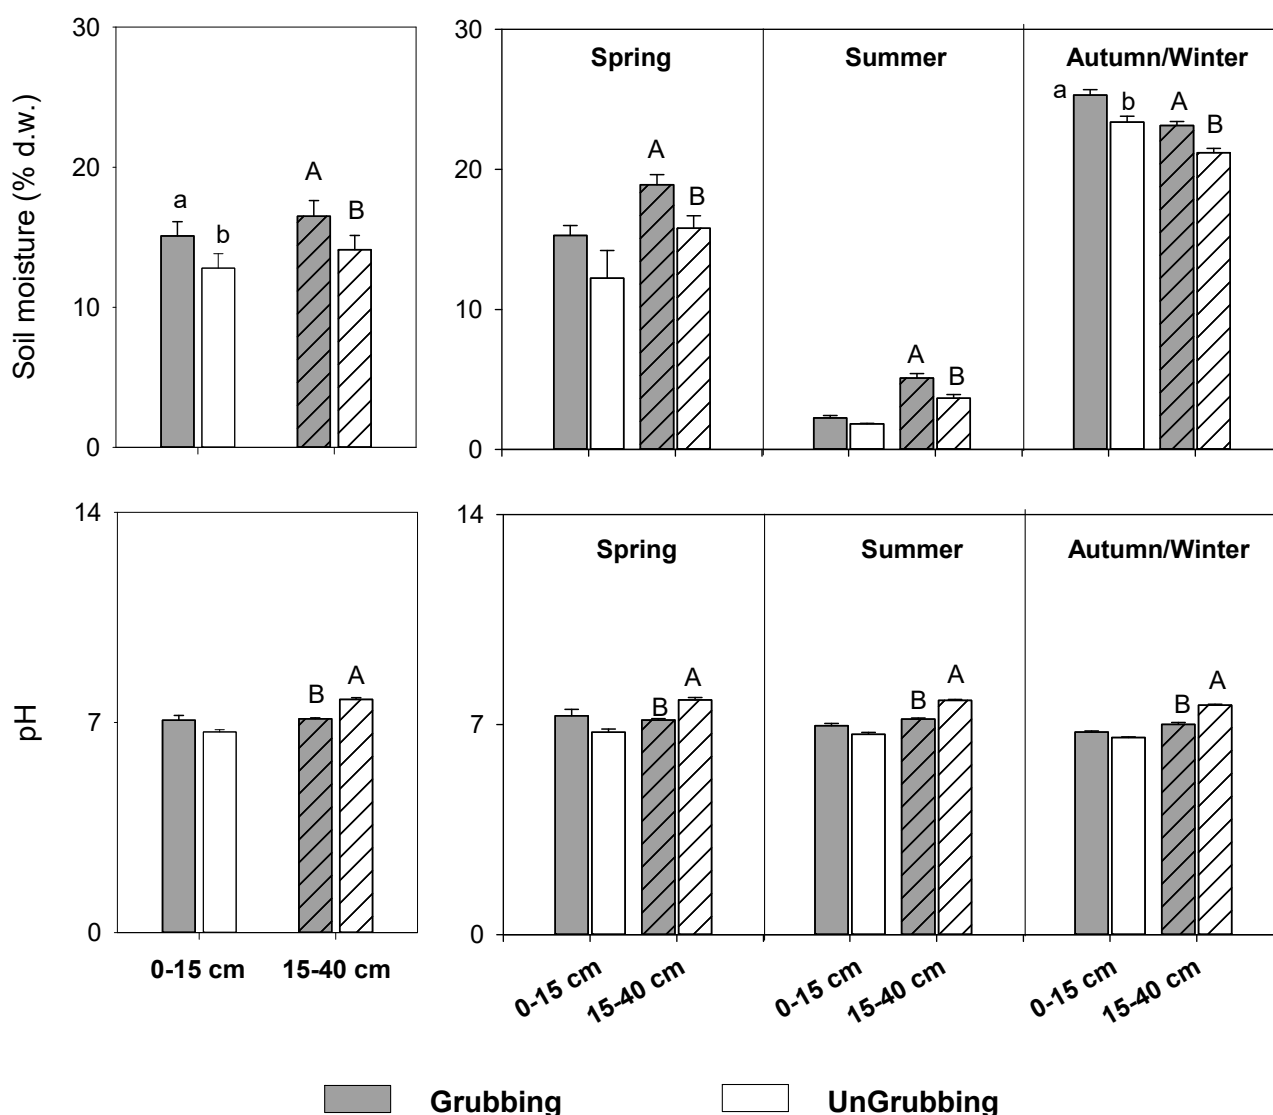

**Supplementary material Figure S1.** Soil moisture (SM, % d.w.) and pH in grubbed (G) and ungrubbed (UG) soils at 0-15 and 15-40 cm depth. On the left, the annual means are reported; on the right, data for each season (Spring, Summer, and Autumn/Winter) were showed. Different lowercase letters indicate significant differences in superficial layer, whereas uppercase letters show significant difference in deeper layer for at least  $P < 0.05$  (paired t-test for annual means and Three-way ANOVA for seasonal means, respectively).

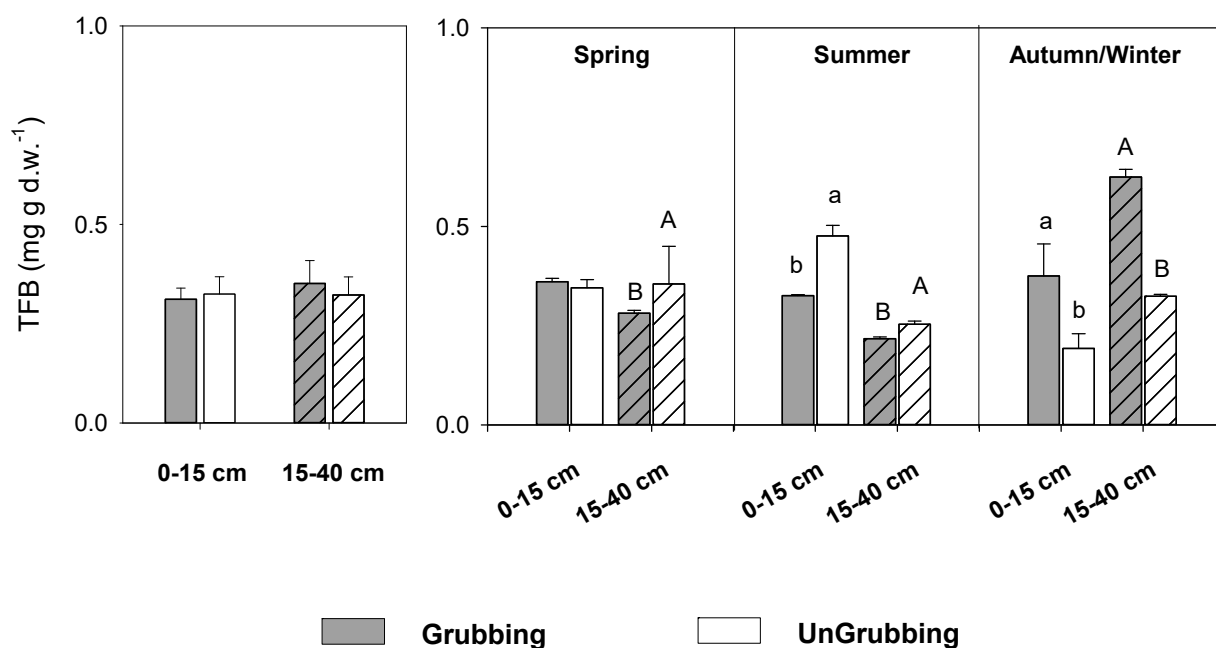

**Supplementary material Figure S2.** Total Fungal Biomass (TFB, mg g d.w.<sup>-1</sup>) in grubbed (G) and ungrubbed (UG) soils at 0-15 and 15-40 cm depth. On the left, the annual means are reported; on the right, data for each season (Spring, Summer, and Autumn/Winner) are showed. Different lowercase letters indicate significant differences in superficial layer, whereas uppercase letters show significant difference in deeper layer for at least P < 0.05 (paired t-test for annual means and Three-way ANOVA for seasonal means, respectively).

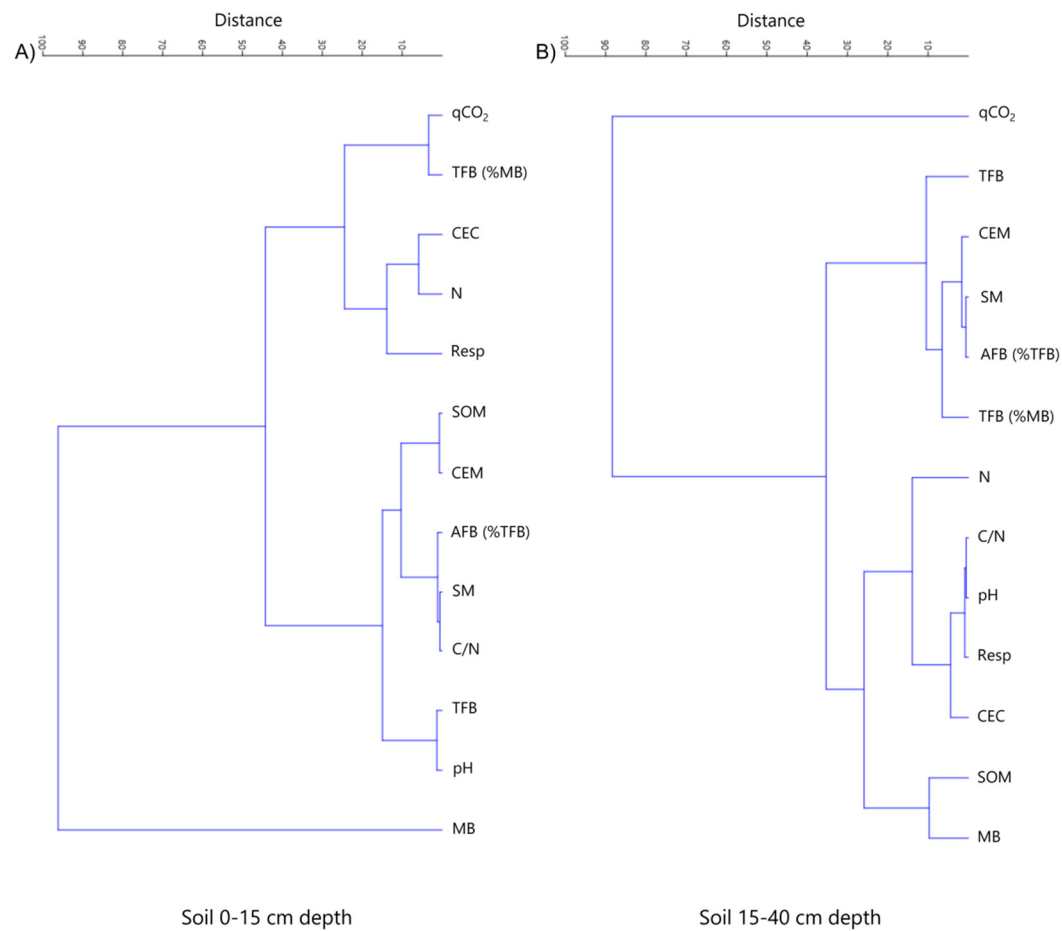

**Supplementary material Figure S3.** Cluster analyses (UPGMA) summarizing the different impact of wild boar grubbing (IF<sub>G</sub>) on soil parameters at 0-15 (A) and 15-40 cm (B).

**Supplementary material Table S1.** Coefficients of Spearman rank order correlation performed between biological (MB: microbial biomass, AFB (%TFB): percentage of active on total fungal biomass, TFB: total fungal biomass, TFB(%MB): percentage of fungal on total microbial biomass, Respiration, qCO<sub>2</sub>: metabolic quotient, CEM: coefficient of endogenous mineralization) and physical and chemical parameters (pH, SM: soil moisture, SOM: soil organic matter, Ns: soil nitrogen, soil C/Ns ratio, CEC: cation exchange capability, WHC: water holding capacity, BD: bulk density) in grubbed (G) and ungrubbed (UG) soils sampled at 0-15 and 15-40 cm depth. The correlations between the biological parameters and WHC and BD are reported only for the superficial layer. In bold statistically significant coefficients for P < 0.05 (\*), P < 0.01 (\*\*) and P < 0.001 (\*\*\*) are indicated.

|                  |          | G                |                  |                  |                  |                  |        |        |        |
|------------------|----------|------------------|------------------|------------------|------------------|------------------|--------|--------|--------|
|                  |          | pH               | SM               | SOM              | Ns               | C/Ns             | CEC    | WHC    | BD     |
| MB               | 0-15 cm  | 0.263            | <b>0.573*</b>    | -0.538           | -0.322           | -0.007           | 0.218  | -0.148 | -0.148 |
|                  | 15-40 cm | -0.365           | 0.518            | <b>0.600*</b>    | <b>-0.655*</b>   | 0.209            | 0.109  |        |        |
| AFB(%TFB)        | 0-15 cm  | <b>-0.636*</b>   | <b>-0.583*</b>   | <b>0.700*</b>    | 0.567            | -0.350           | 0.109  | -0.316 | -0.316 |
|                  | 15-40 cm | 0.046            | 0.378            | 0.503            | -0.503           | 0.287            | -0.546 |        |        |
| TFB              | 0-15 cm  | <b>0.754**</b>   | 0.330            | -0.382           | <b>-0.792***</b> | 0.473            | 0.218  | 0.030  | 0.030  |
|                  | 15-40 cm | 0.077            | 0.189            | <b>0.727**</b>   | -0.371           | 0.406            | 0.109  |        |        |
| TFB(%MB)         | 0-15 cm  | -0.030           | <b>-0.879***</b> | 0.042            | 0.018            | 0.103            | -0.109 | 0.135  | 0.135  |
|                  | 15-40 cm | 0.419            | <b>-0.587*</b>   | <b>0.657*</b>    | <b>0.657*</b>    | -0.259           | 0.218  |        |        |
| Respiration      | 0-15 cm  | -0.487           | -0.265           | 0.384            | 0.470            | -0.384           | 0.436  | 0.131  | 0.131  |
|                  | 15-40 cm | 0.405            | <b>-0.720**</b>  | 0.238            | <b>0.566*</b>    | <b>-0.587*</b>   | 0.327  |        |        |
| qCO <sub>2</sub> | 0-15 cm  | -0.560           | -0.382           | 0.527            | <b>0.618*</b>    | -0.500           | 0.218  | 0.048  | 0.048  |
|                  | 15-40 cm | 0.286            | <b>-0.655*</b>   | -0.545           | <b>0.764**</b>   | -0.0182          | -0.436 |        |        |
| CEM              | 0-15 cm  | 0.089            | -0.323           | -0.501           | -0.191           | 0.150            | 0.327  | 0.261  | 0.261  |
|                  | 15-40 cm | -0.200           | -0.385           | <b>-0.734**</b>  | 0.483            | -0.350           | 0.436  |        |        |
|                  |          | UG               |                  |                  |                  |                  |        |        |        |
| MB               | 0-15 cm  | 0.031            | 0.235            | 0.214            | -0.245           | -0.007           | -0.327 | 0.563  | 0.563  |
|                  | 15-40 cm | 0.059            | <b>0.748**</b>   | 0.238            | -0.378           | <b>-0.921***</b> | -0.218 |        |        |
| AFB(%TFB)        | 0-15 cm  | -0.127           | <b>0.673*</b>    | 0.091            | -0.427           | 0.200            | 0.218  | -0.140 | -0.140 |
|                  | 15-40 cm | 0.260            | 0.260            | 0.273            | 0.371            | 0.024            | -0.546 |        |        |
| TFB              | 0-15 cm  | -0.126           | <b>-0.621*</b>   | -0.115           | 0.468            | -0.425           | 0.327  | -0.089 | -0.089 |
|                  | 15-40 cm | <b>-0.863***</b> | <b>-0.863***</b> | <b>-0.797***</b> | -0.545           | 0.476            | 0.327  |        |        |
| TFB(%MB)         | 0-15 cm  | -0.049           | -0.455           | -0.069           | 0.455            | -0.280           | 0.218  | -0.059 | -0.059 |
|                  | 15-40 cm | -0.078           | <b>-0.734**</b>  | -0.231           | 0.371            | <b>0.911***</b>  | 0.218  |        |        |
| Respiration      | 0-15 cm  | <b>0.636*</b>    | -0.413           | <b>-0.706**</b>  | 0.371            | 0.503            | -0.109 | 0.030  | 0.030  |
|                  | 15-40 cm | -0.311           | -0.070           | <b>-0.594*</b>   | -0.266           | 0.452            | 0.000  |        |        |
| qCO <sub>2</sub> | 0-15 cm  | <b>0.657*</b>    | -0.517           | <b>-0.769**</b>  | 0.336            | 0.476            | -0.109 | -0.030 | -0.030 |
|                  | 15-40 cm | 0.020            | -0.364           | -0.322           | 0.189            | <b>0.687*</b>    | -0.436 |        |        |
| CEM              | 0-15 cm  | <b>0.702*</b>    | -0.519           | <b>-0.786***</b> | 0.214            | <b>0.575*</b>    | 0.000  | -0.089 | -0.089 |
|                  | 15-40 cm | -0.338           | -0.338           | <b>-0.727**</b>  | -0.378           | 0.294            | 0.436  |        |        |

**Supplementary material Table S2.** Coefficients of Spearman rank order correlation performed between physical and chemical soil parameters (pH, CEC: cation exchange capability, SM: soil moisture, WHC: water holding capacity, BD: bulk density, SOM: soil organic matter, Ns: soil nitrogen, soil C/N<sub>L</sub> ratio) including SQI and plants features (leaf traits: LA: leaf area, RWC: relative water content, N<sub>L</sub>: leaf nitrogen leaf C/N<sub>L</sub> ratio and fruit characteristics: P/S: pulp/stone ratio, DM: dry matter and Tp: total polyphenols). Soil, leaves and fruits were sampled in grubbed (G) and ungrubbed (UG) areas and soils sampled at 0-15 and 15-40 cm depth. The correlations between WHC and BD and plants features are reported only for the superficial layer. In bold statistically significant coefficients for P < 0.05 (\*), P < 0.01 (\*\*) and P < 0.001 (\*\*\*) are indicated.

|                  | G               |                 |         |          |                 |                |                 |          |                  |          |                  |                  |                 |         |                |          |
|------------------|-----------------|-----------------|---------|----------|-----------------|----------------|-----------------|----------|------------------|----------|------------------|------------------|-----------------|---------|----------------|----------|
|                  | pH              |                 | SM      |          | SOM             |                | N <sub>s</sub>  |          | C/N <sub>s</sub> |          | CEC              |                  | WHC             | BD      | SQI            |          |
|                  | 0-15 cm         | 15-40 cm        | 0-15 cm | 15-40 cm | 0-15 cm         | 15-40 cm       | 0-15 cm         | 15-40 cm | 0-15 cm          | 15-40 cm | 0-15 cm          | 15-40 cm         | 0-15 cm         | 0-15 cm | 0-15 cm        | 15-40 cm |
| LA               | 0.007           | -0.114          | 0.281   | 0.007    | -0.029          | -0.056         | 0.188           | -0.084   | -0.039           | 0.231    | <b>-0.873***</b> | <b>-0.828***</b> | -0.207          | -0.207  | <b>-0.441*</b> | 0.217    |
| RWC              | 0.315           | -0.346          | 0.251   | -0.035   | <b>-0.439*</b>  | -0.301         | <b>-0.450*</b>  | 0.210    | 0.220            | -0.336   | 0.327            | -0.312           | -0.177          | -0.177  | -0.161         | -0.308   |
| N <sub>L</sub>   | <b>-0.459*</b>  | <b>-0.583**</b> | -0.261  | 0.196    | 0.086           | <b>0.538**</b> | 0.199           | -0.231   | <b>-0.540**</b>  | 0.378    | <b>0.510*</b>    | <b>0.475*</b>    | 0.118           | 0.118   | 0.035          | 0.049    |
| C/N <sub>L</sub> | 0.375           | -0.105          | 0.066   | -0.241   | -0.093          | -0.364         | -0.350          | 0.371    | <b>0.419*</b>    | -0.140   | 0.020            | 0.020            | 0.207           | 0.207   | -0.147         | -0.308   |
| P/S              | 0.072           | 0.051           | 0.353   | -0.146   | -0.057          | 0.087          | <b>-0.466*</b>  | -0.116   | 0.175            | 0.116    | 0.171            | -0.171           | <b>0.851***</b> | -0.153  | 0.087          | 0.235    |
| DM               | 0.077           | 0.056           | 0.358   | -0.151   | <b>0.562**</b>  | 0.092          | <b>-0.471*</b>  | -0.121   | 0.184            | 0.134    | 0.176            | -0.176           | <b>0.864***</b> | -0.268  | 0.091          | 0.273    |
| Tp               | 0.171           | 0.123           | 0.355   | -0.148   | -0.059          | 0.089          | <b>-0.568**</b> | -0.100   | 0.177            | 0.118    | 0.213            | -0.184           | <b>0.847***</b> | -0.047  | 0.089          | 0.217    |
|                  | UG              |                 |         |          |                 |                |                 |          |                  |          |                  |                  |                 |         |                |          |
| LA               | -0.294          | -0.297          | 0.105   | 0.262    | <b>-0.538**</b> | -0.266         | 0.188           | -0.084   | -0.044           | -0.056   | 0.327            | 0.327            | -0.207          | -0.207  | <b>-0.601*</b> | 0.245    |
| RWC              | <b>-0.566**</b> | 0.251           | -0.236  | -0.042   | 0.270           | -0.315         | <b>-0.450*</b>  | 0.210    | -0.175           | 0.235    | <b>0.516*</b>    | <b>0.499*</b>    | -0.266          | -0.266  | -0.119         | -0.049   |
| N <sub>L</sub>   | <b>-0.522**</b> | <b>-0.510*</b>  | 0.122   | 0.000    | 0.389           | -0.301         | 0.199           | -0.231   | <b>-0.542**</b>  | 0.256    | <b>0.517*</b>    | <b>0.451*</b>    | -0.384          | -0.384  | -0.035         | 0.112    |
| C/N <sub>L</sub> | 0.308           | 0.160           | -0.249  | -0.007   | <b>-0.424*</b>  | 0.273          | -0.350          | 0.371    | <b>0.479*</b>    | -0.196   | -0.109           | -0.109           | 0.355           | 0.355   | 0.007          | -0.007   |
| P/S              | 0.235           | -0.317          | 0.146   | 0.116    | 0.116           | -0.087         | <b>-0.466*</b>  | -0.116   | -0.057           | -0.028   | -0.171           | -0.171           | <b>0.853***</b> | -0.174  | <b>0.441*</b>  | 0.146    |
| DM               | 0.256           | -0.345          | 0.199   | 0.222    | <b>0.525*</b>   | -0.098         | <b>-0.471*</b>  | -0.121   | -0.079           | -0.080   | 0.187            | -0.187           | <b>0.868***</b> | -0.222  | <b>0.443*</b>  | 0.148    |
| Tp               | 0.237           | 0.053           | 0.148   | 0.118    | 0.118           | -0.089         | <b>-0.568**</b> | -0.100   | -0.099           | -0.035   | 0.173            | -0.173           | <b>0.855***</b> | -0.301  | <b>0.449*</b>  | 0.100    |
